# Supplementary material for: Using Solid-Phase Microextraction Coupled with Reactive Carbon Fiber Ionization-Mass Spectrometry for the Detection of Aflatoxin B1 from Complex Samples
Source: MDPI journal article supplement (doi:10.3390/separations9080199), 2022-08-02
Supplement: s1 [file s1]

# Using Solid Phase Microextraction Coupled with Reactive Carbon Fiber Ionization Mass Spectrometry for the Detection of Aflatoxin B1 from Complex Samples

Jia-Jen Tsai <sup>1</sup>, Yu-Ting Lai <sup>1</sup>, Yu-Chie Chen <sup>1,2,\*</sup><sup>1</sup> Department of Applied Chemistry, National Yang Ming Chiao Tung University, Hsinchu 300, Taiwan;<sup>2</sup> International College of Semiconductor Technology, National Yang Ming Chiao Tung University, Hsinchu 300, Taiwan

\* Correspondence: yuchie@nycu.edu.tw; Tel.: +886-3-5131527; Fax: +886-3-5173764.

## Additional Experimental Section

### Reagents and materials

AFB1 was purchased from Fermentek (Jerusalem, Israel). Acetic acid, AFG1, arginine, cytochrome c, and hexylamine were purchased from Sigma-Aldrich (St. Louis, MO, USA). Ametryn and ethanol were purchased from Riedel de Haën (Seelze, Germany). Tris(hydroxymethyl)-aminomethane (Tris), Tris hydrochloride, and nitric acid were obtained from J. T. Baker (Phillipsburg, NJ, USA). Butylamine was purchased from Alfa Aesar (Ward Chester, PA, SA), whereas acetonitrile was acquired from Merck (Darmstadt, Germany). Acetone and methanol were purchased from Echo (Miaoli, Taiwan) and Macron Fine Chemicals (Center Valley, PA, USA), respectively. Synthetic peptides were obtained from GL Biochem (Shanghai, China). Ultrapure water (18.2  $\Omega$ ) was obtained from a Merck Millipore water purification system (Billerica, MA, USA). Mechanical pencil leads (types: HB, B, and 2B) were obtained from Pilot (Tokyo, Japan). Sandpapers and peanuts were purchased from local stores.

### Instrumentation

All the mass spectra were obtained using a Bruker Daltonics AmaZon SL mass spectrometer (Bremen, Germany). When operating in positive ion mode, the voltage applied to the orifice of the mass spectrometer was set to  $-4500$  V. The nebulizer was switched off during MS analysis. The temperature of the ion transfer capillary was set at  $200$  °C. The number of collecting ions set at the ion charge control was 70,000, whereas the maximum acquisition time was set to 100 ms. The length of the metal extension tube (inner diameter:  $\sim 1.0$  mm; outer diameter:  $\sim 1.5$  mm) adapted to the orifice of the mass spectrometer was  $\sim 4$  cm. The inner diameter of the ion transfer capillary was  $\sim 0.024$  inch ( $= \sim 0.061$  cm), while the outer diameter of the ion transfer capillary was  $\sim 0.256$  inch ( $= \sim 0.657$  cm). An assembled Raman spectroscope (Protrustech, Taipei, Taiwan) equipped with a spectrometer (Andor Technology Ltd., Belfast, UK) and a continuous-wave laser ( $\lambda = 532$  nm) was used to obtain Raman spectra. The total exposure time for signal acquisition was 1 s, whereas each spectrum was obtained from 10 acquisitions. A camera (SG-210X) from Sage Vision (New Taipei City, Taiwan) was used to record and take images during MS analysis. Ultraviolet-visible absorption spectra were obtained using a Varian Cary 50 UV-Vis absorption spectroscope (CA, USA).

# Additional Tables

**Table S1.** List of the existing methods for analysis of AFB1 and related mycotoxins.

| Sample pretreatment                  | Analytes                             | Sample preparing time (h) | Detection tool | Analysis time (min) | Real samples or matrix                                                         | LOD (or LOQ) of AFB1 | Ref. |
|--------------------------------------|--------------------------------------|---------------------------|----------------|---------------------|--------------------------------------------------------------------------------|----------------------|------|
| ELISA                                | AFB1, AFB2, AFG1, and AFG2           | ~55                       | HPLC           | 15                  | Peanuts, Corn, Pistachio, and Soybeans                                         | 32.02 nM             | 23   |
| LLE–LTP                              | AFB1, AFB2, AFG1, AFG2, AFM1 and OTA | >12                       | HPLC/FLD       | 60                  | Breast milk                                                                    | LOQ= 0.016–0.10 nM   | 24   |
| ECL sensor                           | AFB1                                 | ~73                       | ECL Aptasensor | -                   | Peanut, Maize, and Wheat                                                       | 0.12 pM              | 25   |
| Versatile ECL and EC “on–off” assays | AFB1 and MTase                       | ~35                       | ECL Biosensor  | 2.75 hr             | Peanuts                                                                        | 0.06 pM              | 26   |
| QuEChERS                             | AFB1                                 | ~0.5                      | LC-MS/MS       | 4.5                 | Pu-erh tea                                                                     | 1.60 nM              | 27   |
| SPE                                  | BPA, AFB1, OTA, and patulin          | ~1                        | LC/MS/MS       | 20                  | Grape juice, Apple juice, Cereal, Cereal-based baby formula, and Peanut butter | LOQ=1.6 nM           | 28   |
| LLE combined with SPE                | AFB1, BP and 4-Nonylphenol           | ~1                        | UPLC-MS/MS     | 6                   | Peanut oils                                                                    | LOQ= 0.64 nM         | 29   |
| Miniaturized SPE                     | AFB1 and AFM1                        | ~0.5                      | UHPLC–Q/TOF-MS | 8                   | Milk and Jujube                                                                | 0.07 nM              | 14   |
| SPE                                  | AFB1-Lys                             | ~76                       | LC/MS/MS       | 14.8                | Rat serum                                                                      | 0.80 nM              | 30   |
| MGO affinity probe                   | AFB1                                 | ~20                       | SALDI-MS       | <1                  | Wheat extract, peanut extract, spore lysate of <i>A. flavus</i> 30112          | 1 nM                 | 31   |
| SPME                                 | mVOCs emitted by toxigenic and non-  | ~4                        | GC-MS          | ~55                 | -                                                                              | -                    | 32   |

| toxigenic strains of<br><i>A. flavus</i> |                              |          |               |    |                                  |                                                         |    |
|------------------------------------------|------------------------------|----------|---------------|----|----------------------------------|---------------------------------------------------------|----|
| HLLE                                     | AFB1                         | ~1       | HPLC-<br>FLD  | 20 | Rice and grain                   | 0.01 nM                                                 | 33 |
| UHPLC-FLD                                | AFB1 and OTA                 | ~26      | UHPLC-<br>FLD | 15 | Rat plasma, liver, and<br>kidney | 6.4 nM in plasma<br>and 25.6 nM in liver<br>and kidney. | 34 |
| MSPE                                     | AFB1, AFB2,<br>AFG1 and AFG2 | < 15 min | HPLC-<br>FLD  | 20 | Vegetable oils                   | 0.06 nM                                                 | 35 |
| SPE                                      | AFB1                         | ~59      | HPLC          | 15 | Moldy corn and<br>peanut         | 28.82 nM in corn<br>and 73.65 nM in<br>peanut           | 36 |

---

AFB1, AFB2, AFG1, AFG2 and AFM1: Aflatoxin B1, B2, G1, G2, M1; AFB1-Lys: Aflatoxin B1-lysine adduct; BPA: Bisphenol A; EC: Electrochemical; ECL: Electrochemiluminescence; ELISA: Enzyme-linked immunosorbent assay; GC-MS: Gas chromatography–mass spectrometry; HLLE: homogeneous liquid–liquid extraction; HPLC: High performance liquid chromatography; HPLC-FLD: High performance liquid chromatography with fluorescence detector; LC-MS/MS: Liquid chromatography-tandem mass spectrometry; LLE: Liquid-liquid extraction; LLE-LTP: Liquid–liquid extraction with low temperature purification; MGO: Magnetic graphene oxide; MSPE: Magnetic solid phase extraction; MTase: Dam methylase; mVOCs: Microbial-derived volatile organic compounds; OTA: Ochratoxin A; QuEChERS: Quick, easy, cheap, effective, rugged and safe; SALDI-MS: Surface-assisted laser desorption/ionization mass spectrometry; SPE: Solid-phase extraction; SPME: solid phase microextraction; UHPLC-FLD: Ultra high performance liquid chromatography with fluorescence detector; UHPLC-Q/TOF-MS: Ultra high-performance liquid chromatography and quadrupole time-of-flight tandem mass spectrometry; UPLC-MS/MS: Ultra performance liquid chromatography-tandem mass spectrometry

**Table S2.** List of the existing SPME approaches for the analysis of AFB1.

| SPME adsorbents                             | Time for preparation the adsorbents (h) | Extraction time (min) | Elution Time (min) | Volume of elution solvent | Detection tools | Analysis time (min) | LOD (nM) | Ref.      |
|---------------------------------------------|-----------------------------------------|-----------------------|--------------------|---------------------------|-----------------|---------------------|----------|-----------|
| Carbon nanotube reinforced sol–gel in-fiber | ~7                                      | 60                    | 15                 | 2 mL                      | HPLC-DAD        | 10                  | 0.24     | 64        |
| Home-made PDMS/DVB 60 µm fiber              | -                                       | 30                    | 3.5                | 8 mL                      | HPLC-PD-FD      | 8                   | 0.22     | 65        |
| GC capillary column (Supel-Q PLOT)          | -                                       | Total 25 min          |                    | 8 mL                      | LC-MS           | 12                  | 7.69     | 66        |
| Molecularly imprinted polymer               | ~102                                    | 15                    | 15                 | 5 mL                      | LC-MS/MS        | 15                  | 0.66     | 67        |
| Molecularly imprinted polymer               | ~52                                     | 10                    | 15                 | 5 mL                      | UHPLC-MS/MS     | 15                  | 1.34     | 68        |
| Functionalized zinc oxide nanorods          | ~48                                     | 1                     | 2                  | 1 mL                      | HPLC-FLD        | -                   | 0.22     | 69        |
| C18                                         | -                                       | 2                     | -                  | 100 µL                    | UHPLC-Q/TOF-MS  | 8                   | 0.07     | 14        |
| Poly (MAA-co-DVB) monolithics               | ~38                                     | 13                    | 6                  | 360 µL                    | HPLC            | 7                   | 6.5      | 70        |
| 2B pencil lead                              | ~5                                      | 120                   | < 1                | 10 µL                     | CFI-MS          | < 1                 | 1.25     | This work |

ACN: acetonitrile; C18: silica particles functionalized with octadecyltrimethoxysilane; CFI-MS: carbon fiber ionization-mass spectrometry; EtOH: ethanol; HPLC: high performance liquid chromatography; HPLC-DAD: high performance liquid chromatography–diode array detection; HPLC-FLD: high performance liquid chromatography with fluorescence detector; HPLC-PD-FD: high performance liquid chromatography with post-column photochemical derivatization and fluorescence detection; LC-MS: liquid chromatography–mass spectrometry; LC-MS/MS: liquid chromatography–tandem mass spectrometry; MeOH: methanol; PDMS/DVBH: polydimethylsiloxane/divinylbenzene; Poly (MAA-co-DVB): poly (methacrylic acid-co-diethenyl-benzene); Supel-Q PLOT: porous polymer-type capillary column (divinylbenzen polymer, film thickness of 17 µm); UHPLC-MS/MS: ultrahigh-performance liquid chromatography–tandem mass spectrometry; UHPLC-Q/TOF-MS: ultra-high performance liquid chromatography and quadrupole time-of-flight tandem mass spectrometry

# Additional Figures

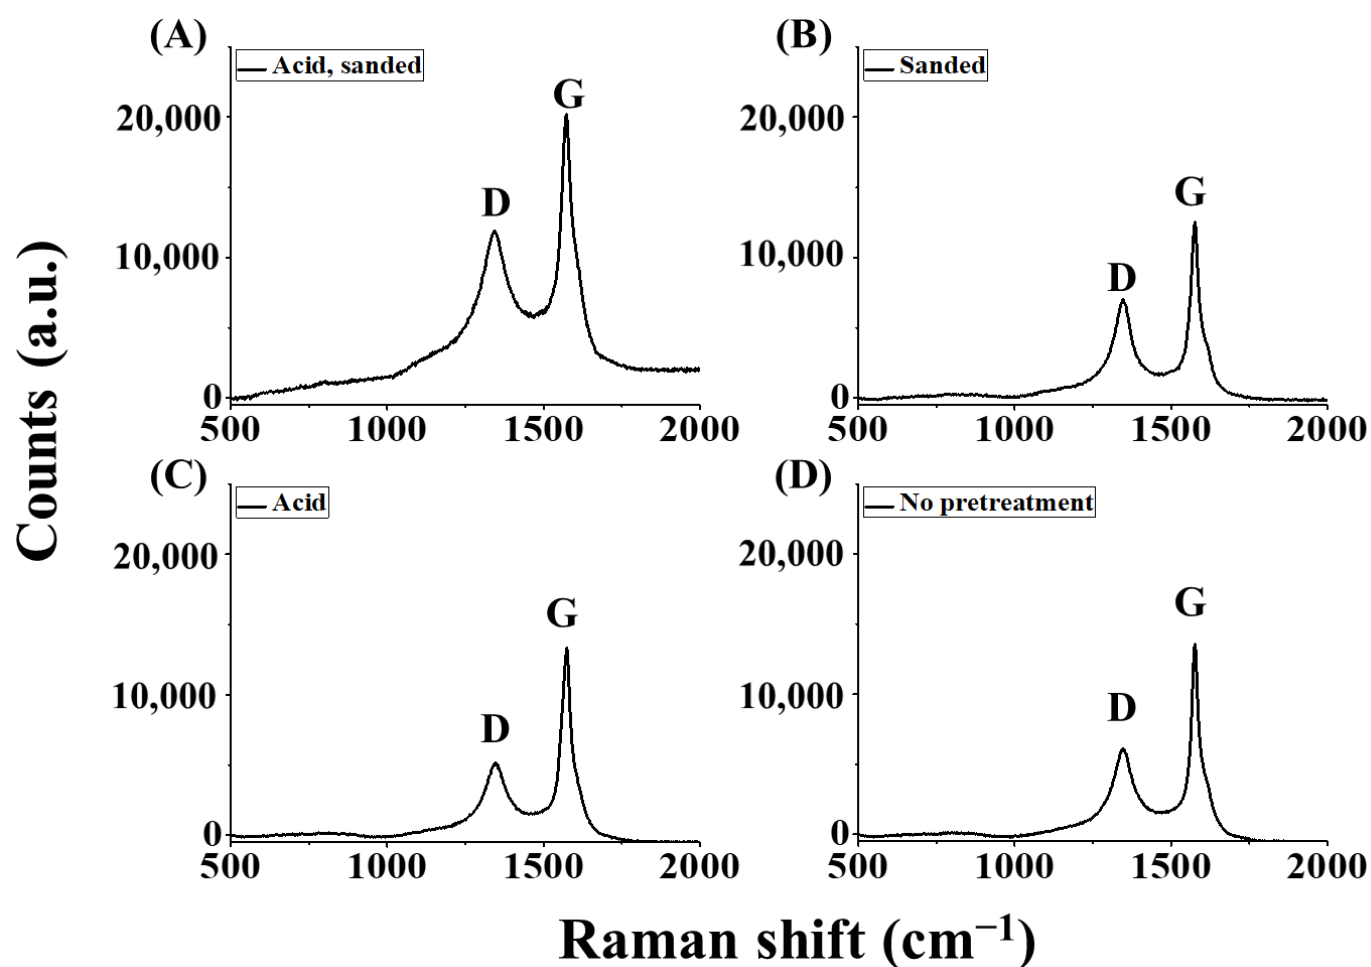

**Figure S1.** Raman spectra of 2B pencil leads obtained after treated by (A) sanding and subsequent acid treatment, (B) sanding treatment only, (C) soaking in acid treatment, (D) no treatment. The G band stands for the graphite structures, and the D band stands for the discorded graphite structure.

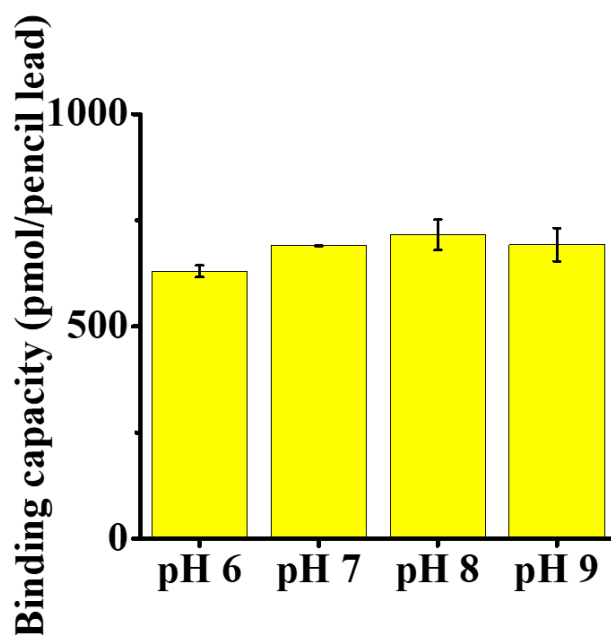

**Figure S2.** Examination of pH effects. Three piece of pencil leads (length: 1cm) were used to trap AFB1 from the sample (0.3 mL) containing AFB1 ( $10^{-5}$  M) at different pH conditions under vortex-mixing for 2 h. The optical density at the wavelength of 365 nm of the supernatants obtained before and after enrichment was used to determine the binding capacity. .

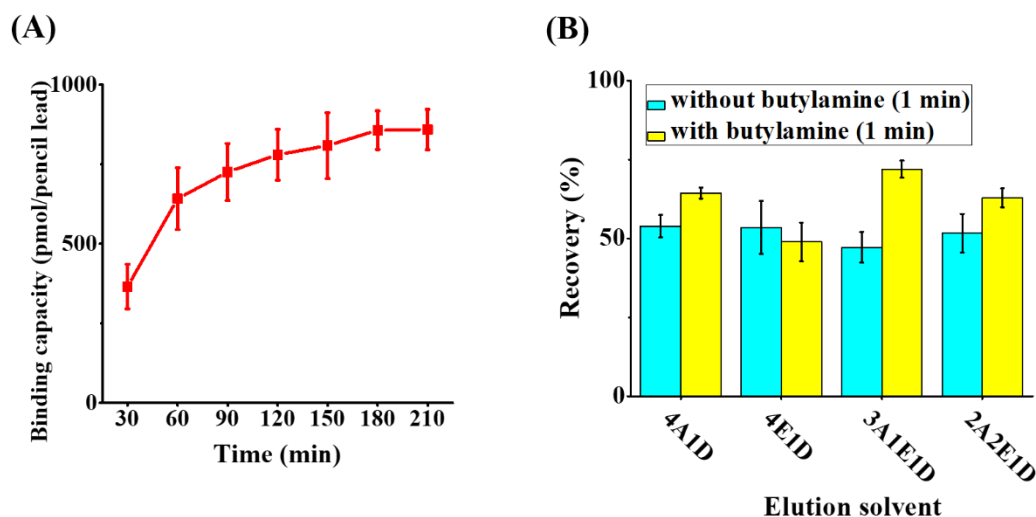

**Figure S3.** Examination of (A) the optimal enrichment time and (B) the recovery with different elution solvents by vortex-mixing the pencil lead adsorbed with AFB1 for 1 min. The experiments were conducted by putting three pieces of pencil leads (length: 1cm) in the sample solution (0.3 mL) containing AFB1 ( $10^{-5}$  M) under vortex-mixing for 2 h. The binding capacity was determined by examination of the optical density at 365 nm of the supernatants obtained before and after enrichment. A, D, and E stand for acetonitrile, deionized water, and ethanol, respectively. .

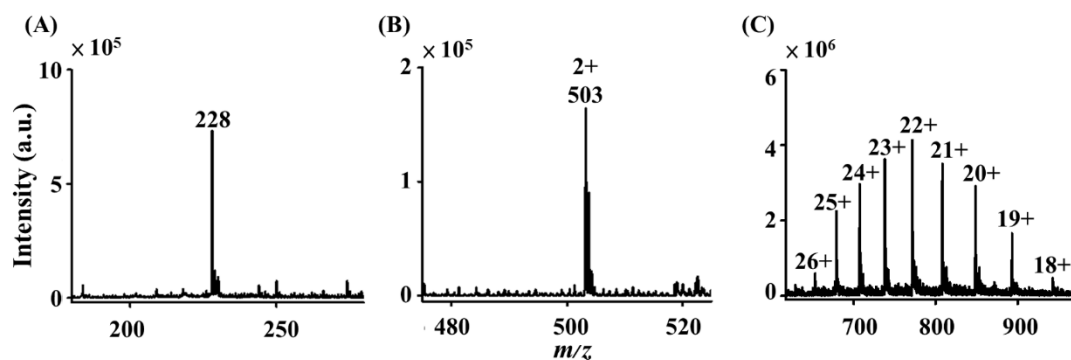

**Figure S4.** Analysis of standard samples using our ionization setup. Mass spectra of (A) ametryn (0.1 μM), (B) DK-10 (1 μM), and (C) myoglobin (1 μM) obtained using our setup. 10 μL of each sample were introduced to the tip of the pipette. All analytes were prepared in solvent containing deionized water and acetonitrile (1:4, v/v). 0.1% acetic acid was added to the sample containing myoglobin.
