# Supplementary material for: Using Solid-Phase Microextraction Coupled with Reactive Carbon Fiber Ionization-Mass Spectrometry for the Detection of Aflatoxin B1 from Complex Samples
Source: MDPI journal article supplement (doi:10.3390/separations9080199), 2022-08-02
Supplement: s1 [file s1]

Archive with 1 entries (1 files):
- separations-1831951-supplementary.pdf
